# Supplementary material for: Polymorphism of (S)-triphenylglycol: kinetic dependent transformation of a new multipolymorphic system
Source: Royal Society of Chemistry journal article supplement (doi:10.1039/b706209e), 2007-01-01
Supplement: b706209e.pdf [file b706209e.pdf]

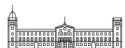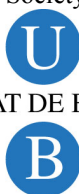

Supplementary Information.

Reference: "Polymorphism of (S)-triphenylglycol: kinetic dependant transformation of a new multipolymorphic system"

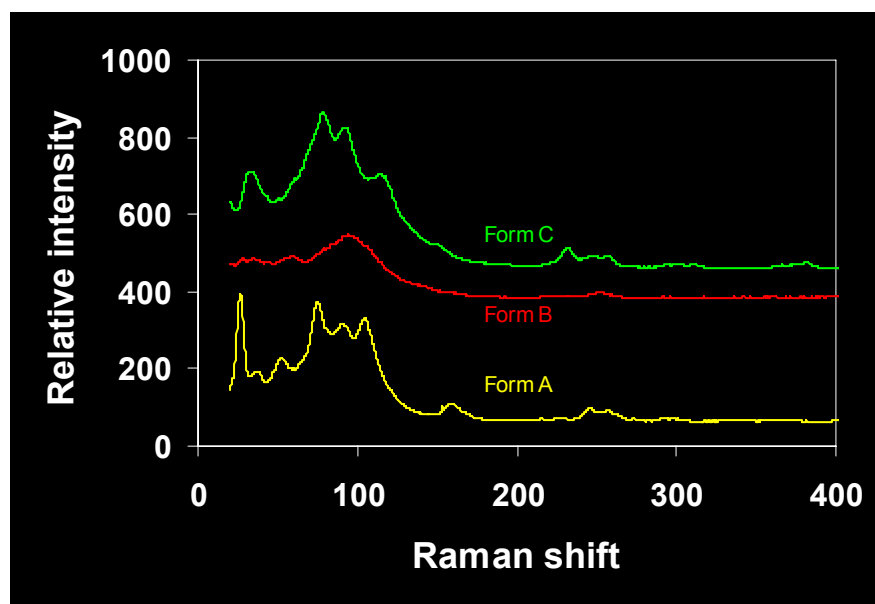

Figure 1. Raman spectra of forms A, B and C.

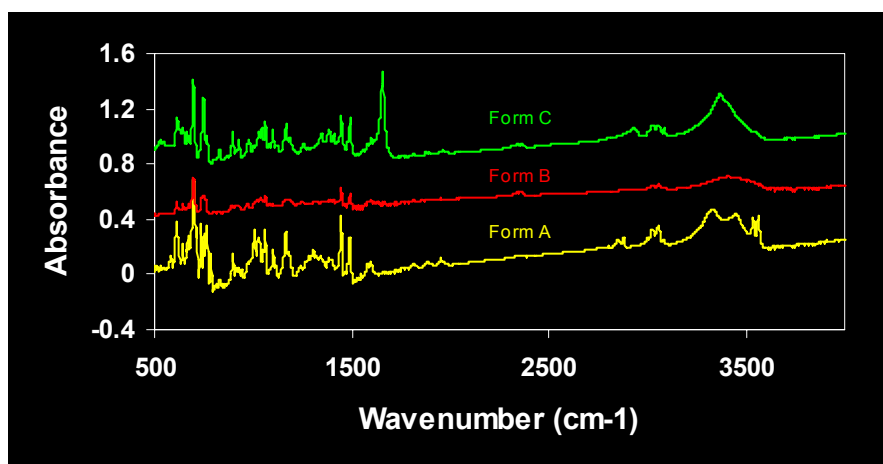

Figure 2. IR spectra of forms A, B and C.

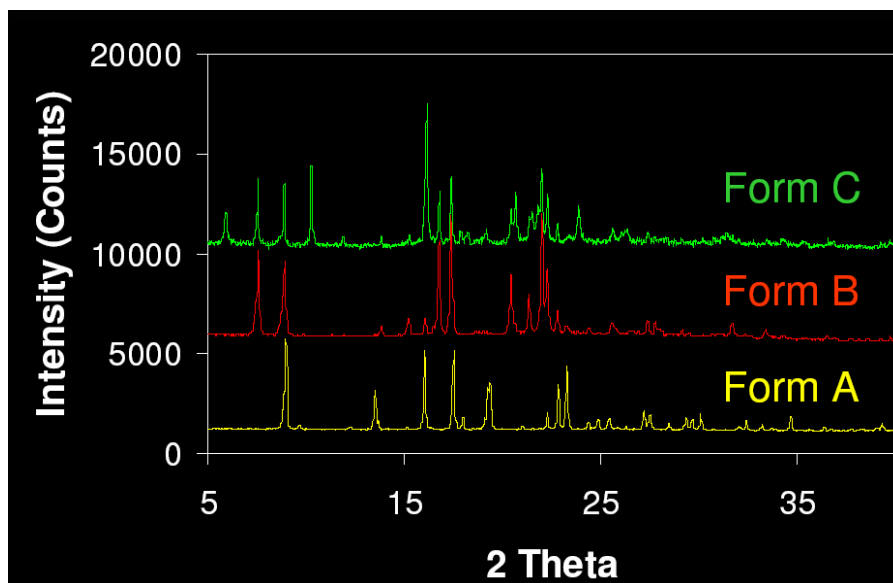

Figure 3. X-ray powder diffraction patterns of forms A, B and C.

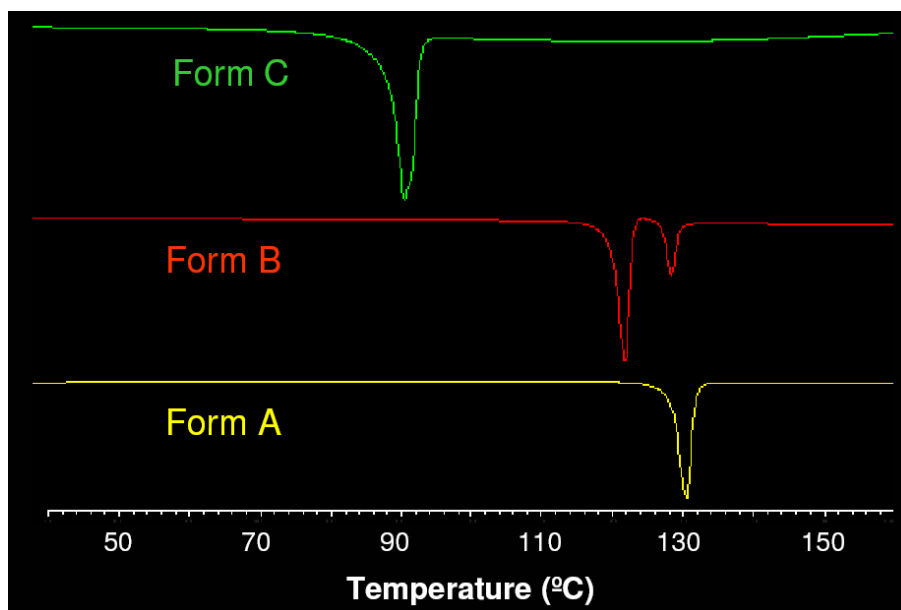

Figure 4. DSC curves of forms A, B and C recorded at 10°C/min. These thermograms show melting of forms A and C, whereas form B melts with crystallization of form A.
